# Supplementary material for: Human umbilical cord mesenchymal stem cells derived extracellular vesicles regulate acquired immune response of lupus mouse in vitro
Source: PubMed Central journal article supplement (PMC9338971; doi:10.1038/s41598-022-17331-8), 2022-07-30
Supplement: 41598_2022_17331_MOESM2_ESM.pdf [file 41598_2022_17331_MOESM2_ESM.pdf]

Table S1. Tukey's multiple comparison test in one-way analysis of variance in CD4<sup>+</sup>T cells

| Tukey's Multiple Comparison Test | Mean Diff. | q      | $P < 0.05$ | Summary | 95% CI of diff  |
|----------------------------------|------------|--------|------------|---------|-----------------|
| PBS vs UCMSCs                    | 9.534      | 4.175  | Yes        | *       | 1.115 to 17.95  |
| PBS vs 25ug/ml EVs               | 4.862      | 2.129  | No         | ns      | -3.558 to 13.28 |
| PBS vs 50ug/ml EVs               | 8.633      | 3.780  | Yes        | *       | 0.2137 to 17.05 |
| UCMSCs vs 25ug/ml EVs            | -4.672     | 2.081  | No         | ns      | -12.95 to 3.606 |
| UCMSCs vs 50ug/ml EVs            | -0.9010    | 0.4012 | No         | ns      | -9.179 to 7.377 |
| 25ug/ml EVs vs 50ug/ml EVs       | 3.771      | 1.680  | No         | ns      | -4.507 to 12.05 |

Table S2. Dunn's multiple comparison test in Kruskal-Wallis test in Th17 cells

| Dunn's Multiple Comparison Test | Difference in rank sum | $P < 0.05$ | Summary |
|---------------------------------|------------------------|------------|---------|
| PBS vs hUCMSCs                  | -10.25                 | Yes        | *       |
| PBS vs 25µg/ml EVs              | -3.500                 | No         | ns      |
| PBS vs 50µg/ml EVs              | -8.975                 | Yes        | *       |
| hUCMSCs vs 25µg/ml EVs          | 6.750                  | No         | ns      |
| hUCMSCs vs 50µg/ml EVs          | 1.275                  | No         | ns      |
| 25µg/ml EVs vs 50µg/ml EVs      | -5.475                 | No         | ns      |

Table S3. Kruskal-Wallis test of Th1 cells in all groups

| Kruskal-Wallis test                        |                        |
|--------------------------------------------|------------------------|
| $P$ value                                  | 0.0767                 |
| Exact or approximate $P$ value?            | Gaussian Approximation |
| $P$ value summary                          | ns                     |
| Do the medians vary signif. ( $P < 0.05$ ) | No                     |
| Number of groups                           | 4                      |
| Kruskal-Wallis statistic                   | 6.853                  |

Table S4. Kruskal-Wallis test of Th2 cells in all groups

| Kruskal-Wallis test                        |                        |
|--------------------------------------------|------------------------|
| $P$ value                                  | 0.6452                 |
| Exact or approximate $P$ value?            | Gaussian Approximation |
| $P$ value summary                          | ns                     |
| Do the medians vary signif. ( $P < 0.05$ ) | No                     |
| Number of groups                           | 4                      |
| Kruskal-Wallis statistic                   | 1.663                  |

Tale S5. Kruskal-Wallis test of Tfh cells in all groups

| Kruskal-Wallis test                            |                        |
|------------------------------------------------|------------------------|
| <i>P</i> value                                 | 0.2004                 |
| Exact or approximate <i>P</i> value?           | Gaussian Approximation |
| <i>P</i> value summary                         | ns                     |
| Do the medians vary signif. ( <i>P</i> < 0.05) | No                     |
| Number of groups                               | 4                      |
| Kruskal-Wallis statistic                       | 4.637                  |

Table S6. One-way analysis of variance of Treg cells in all groups

| One-way analysis of variance                    |        |
|-------------------------------------------------|--------|
| <i>P</i> value                                  | 0.2218 |
| <i>P</i> value summary                          | ns     |
| Are means signif. different? ( <i>P</i> < 0.05) | No     |
| Number of groups                                | 4      |
| F                                               | 1.527  |
| R squared                                       | 0.1005 |

Tale S7. Dunn's multiple comparison test in Kruskal-Wallis test in CD19<sup>+</sup>B cells

| Dunn's Multiple Comparison Test | Difference in rank sum | <i>P</i> < 0.05 | Summary |
|---------------------------------|------------------------|-----------------|---------|
| PBS vs hUCMSCs                  | 10.25                  | Yes             | *       |
| PBS vs 50µg/ml EVs              | 4.432                  | No              | ns      |
| hUCMSCs vs 50µg/ml EVs          | -5.818                 | No              | ns      |

Tale S8. Dunn's multiple comparison test in Kruskal-Wallis test of IFN-γ

| Dunn's Multiple Comparison Test | Difference in rank sum | <i>P</i> < 0.05 | Summary |
|---------------------------------|------------------------|-----------------|---------|
| PBS vs hUCMSCs                  | -22.85                 | Yes             | ***     |
| PBS vs 25µg/ml EVs              | -2.700                 | No              | ns      |
| PBS vs 50µg/ml EVs              | -8.450                 | No              | ns      |
| hUCMSCs vs 25µg/ml EVs          | 20.15                  | Yes             | ***     |
| hUCMSCs vs 50µg/ml EVs          | 14.40                  | Yes             | *       |
| 25µg/ml EVs vs 50µg/ml EVs      | -5.750                 | no              | ns      |

Tale S9. Dunn's multiple comparison test in Kruskal-Wallis test of IL-4

| Dunn's Multiple Comparison Test        | Difference in rank sum | $P < 0.05$ | Summary |
|----------------------------------------|------------------------|------------|---------|
| PBS vs hUCMSCs                         | -18.00                 | Yes        | **      |
| PBS vs 25 $\mu$ g/ml EVs               | -6.800                 | No         | ns      |
| PBS vs 50 $\mu$ g/ml EVs               | -10.60                 | No         | ns      |
| hUCMSCs vs 25 $\mu$ g/ml EVs           | 11.20                  | No         | ns      |
| hUCMSCs vs 50 $\mu$ g/ml EVs           | 7.400                  | No         | ns      |
| 25 $\mu$ g/ml EVs vs 50 $\mu$ g/ml EVs | -3.800                 | No         | ns      |

Table S10. Tukey's multiple comparison test in one-way analysis of variance in IL-17

| Tukey's Multiple Comparison Test       | Mean Diff. | q     | $P < 0.05$ | Summary | 95% CI of diff     |
|----------------------------------------|------------|-------|------------|---------|--------------------|
| PBS vs UCMSCs                          | -29.24     | 16.54 | Yes        | ***     | -35.98 to -22.50   |
| PBS vs 25 $\mu$ g/ml EVs               | -6.794     | 3.842 | Yes        | *       | -13.54 to -0.05284 |
| PBS vs 50 $\mu$ g/ml EVs               | -9.258     | 5.236 | Yes        | **      | -16.00 to -2.516   |
| UCMSCs vs 25 $\mu$ g/ml EVs            | 22.44      | 12.69 | Yes        | ***     | 15.70 to 29.18     |
| UCMSCs vs 50 $\mu$ g/ml EVs            | 19.98      | 11.30 | Yes        | ***     | 13.24 to 26.72     |
| 25 $\mu$ g/ml EVs vs 50 $\mu$ g/ml EVs | -2.464     | 1.393 | No         | ns      | -9.205 to 4.278    |

Tale S11. Dunn's multiple comparison test in Kruskal-Wallis test of TGF- $\beta$ 1

| Dunn's Multiple Comparison Test        | Difference in rank sum | $P < 0.05$ | Summary |
|----------------------------------------|------------------------|------------|---------|
| PBS vs hUCMSCs                         | -29.15                 | Yes        | ***     |
| PBS vs 25 $\mu$ g/ml EVs               | -13.20                 | No         | ns      |
| PBS vs 50 $\mu$ g/ml EVs               | -14.25                 | Yes        | *       |
| hUCMSCs vs 25 $\mu$ g/ml EVs           | 15.95                  | Yes        | *       |
| hUCMSCs vs 50 $\mu$ g/ml EVs           | 14.90                  | Yes        | *       |
| 25 $\mu$ g/ml EVs vs 50 $\mu$ g/ml EVs | -1.050                 | No         | ns      |

Tale S12. Kruskal-Wallis test of IL-10 in supernatant in all groups

| Kruskal-Wallis test                        |                        |
|--------------------------------------------|------------------------|
| $P$ value                                  | 0.3498                 |
| Exact or approximate $P$ value?            | Gaussian Approximation |
| $P$ value summary                          | ns                     |
| Do the medians vary signif. ( $P < 0.05$ ) | No                     |
| Number of groups                           | 4                      |
| Kruskal-Wallis statistic                   | 3.284                  |
